# Supplementary material
Source: publisher figshare collection journal article supplement (https://tandf.figshare.com/articles/dataset/_/12198264)
Supplement: Supplementary file 1 [file 1]

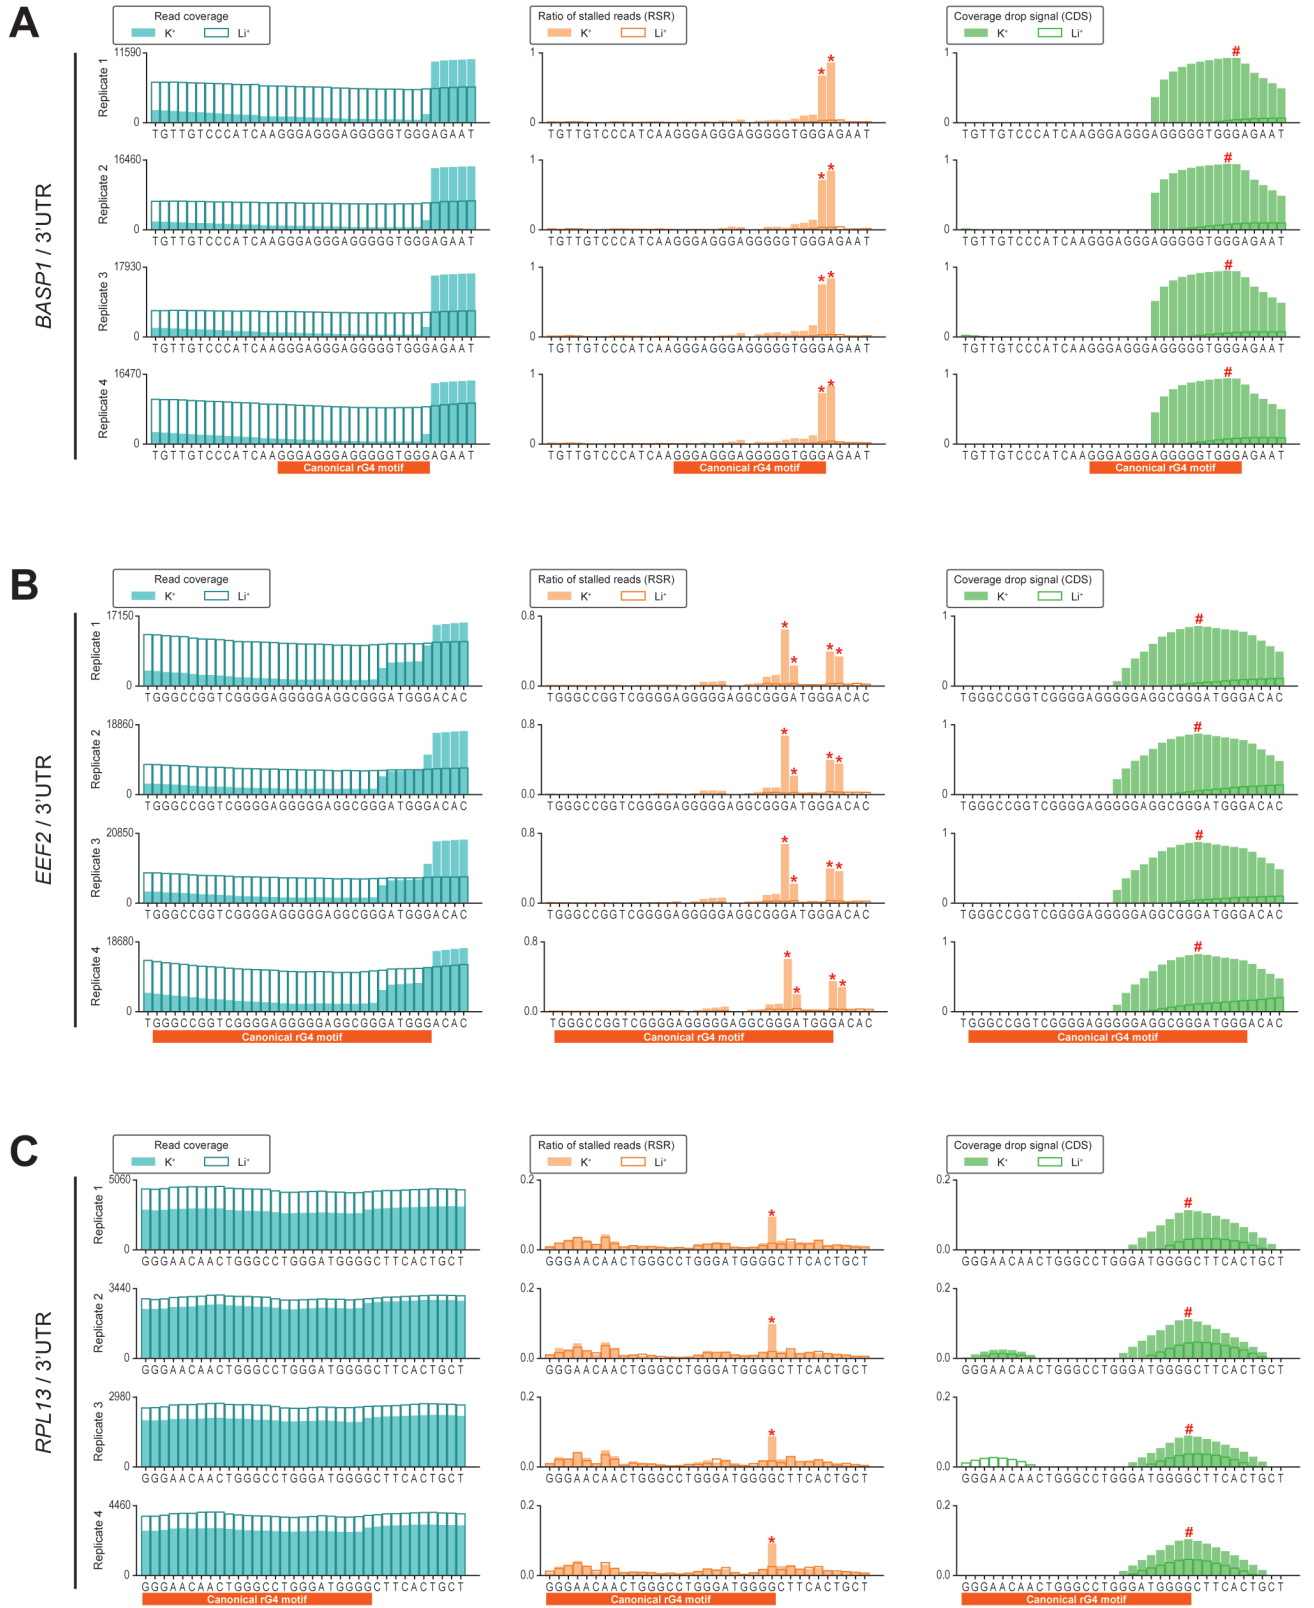

**Figure S1**

Showcases comparing proposed ratio of stalled reads (RSR) metric with coverage drop signal (CDS) metric used to resolve RNA G-quadruplex (rG4)-induced reverse transcriptase stalling (RTS) events at (a) *BASP1* gene (b) *EEF2* gene (c) *RPL13* gene

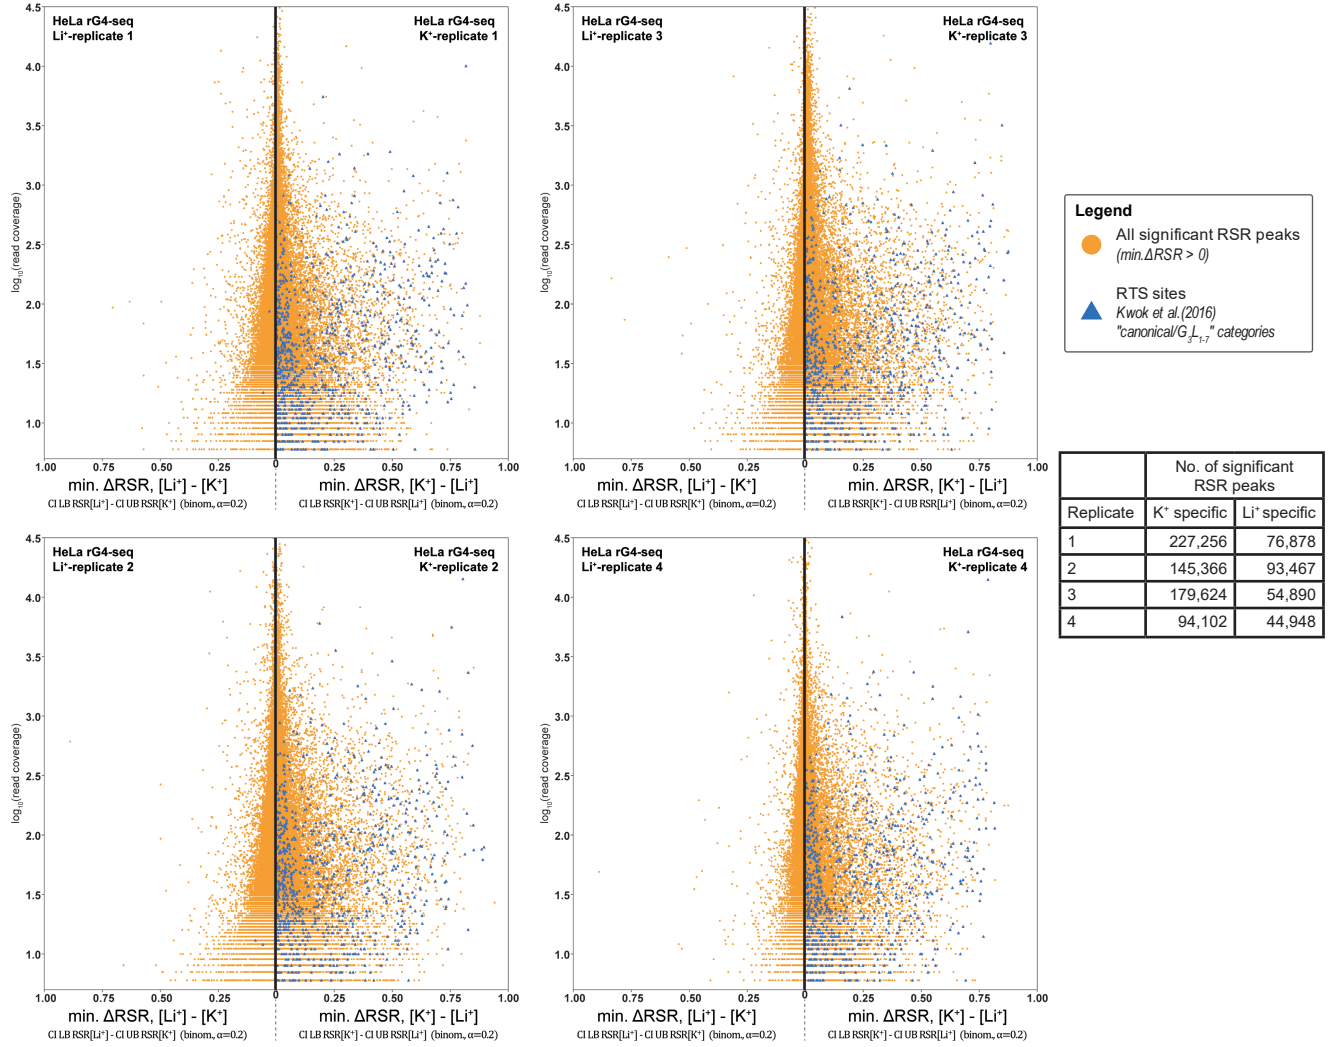

**Figure S2**

Transcriptome-wide significant RSR peaks (minimum  $\Delta RSR > 0$ ) detected from the 4 replicates of HeLa rG4-seq dataset (pairwise comparison between K<sup>+</sup>/Li<sup>+</sup> condition). Minimum  $\Delta RSR$  values (indicating RTS effect strength) of RSR peaks were plotted against read coverage (logarithmic scale). Each datapoint corresponds to 1 RSR peak at 1 single-nucleotide genomic locus. RSR peaks coinciding with RTS sites in canonical/ $G_3L_{1-7}$  reported by Kwok et al. (2016) are highlighted.

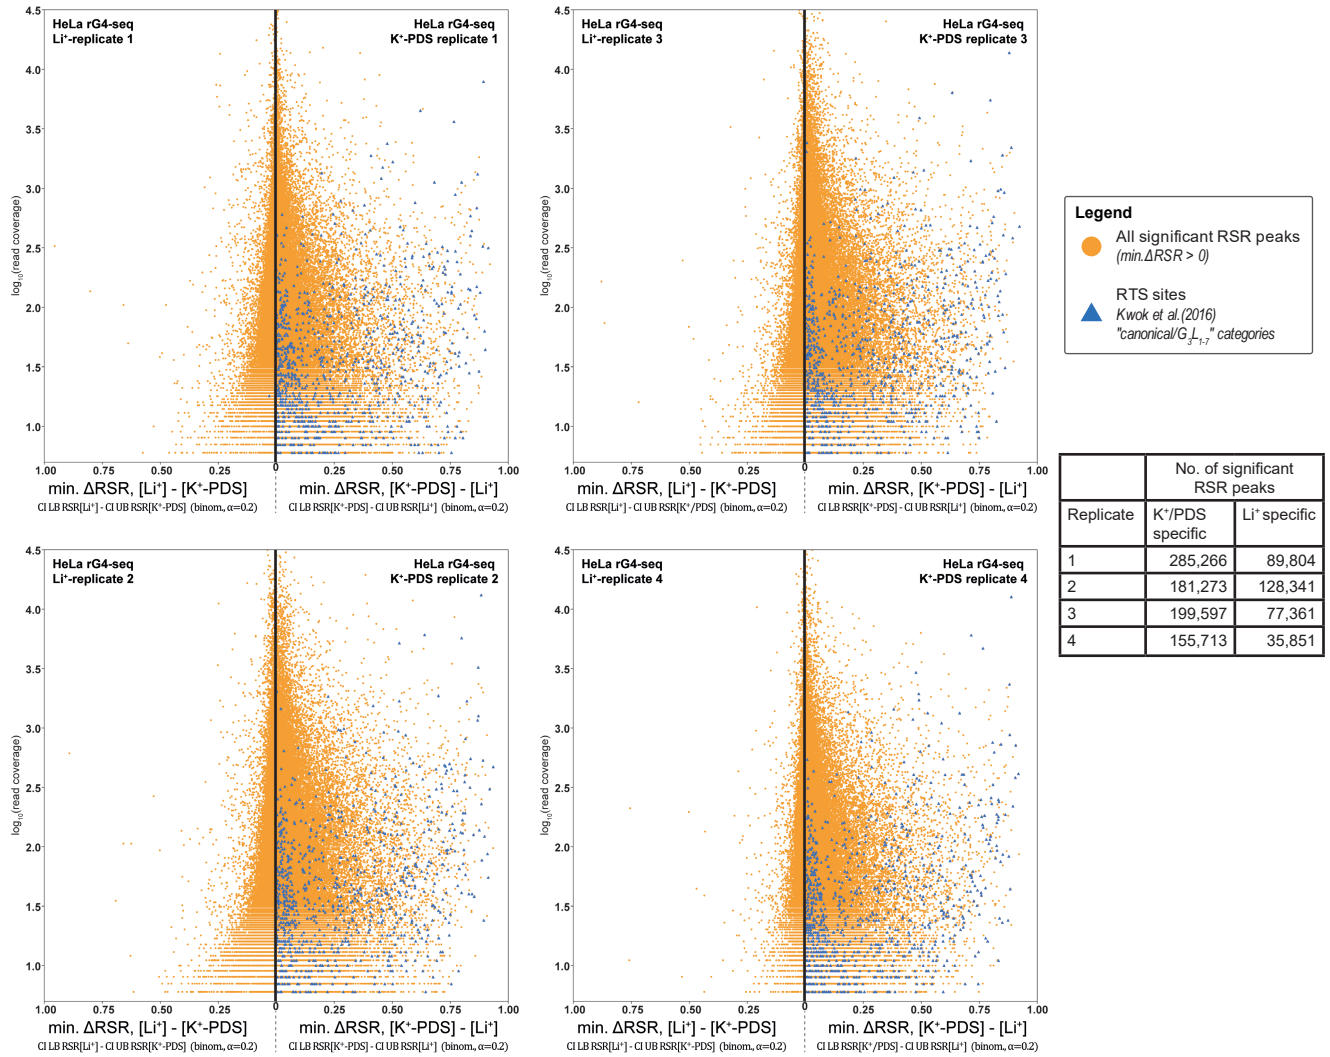

**Figure S3**

Transcriptome-wide significant RSR peaks (minimum  $\Delta RSR > 0$ ) detected from the 4 replicates of HeLa rG4-seq dataset (pairwise comparison between K<sup>+</sup>-PDS/Li<sup>+</sup> condition). Minimum  $\Delta RSR$  values (indicating RTS effect strength) of RSR peaks were plotted against read coverage (logarithmic scale). Each datapoint corresponds to 1 RSR peak at 1 single-nucleotide genomic locus. RSR peaks coinciding with RTS sites in canonical/G<sub>3</sub>L<sub>1-7</sub> reported by Kwok et al. (2016) are highlighted.

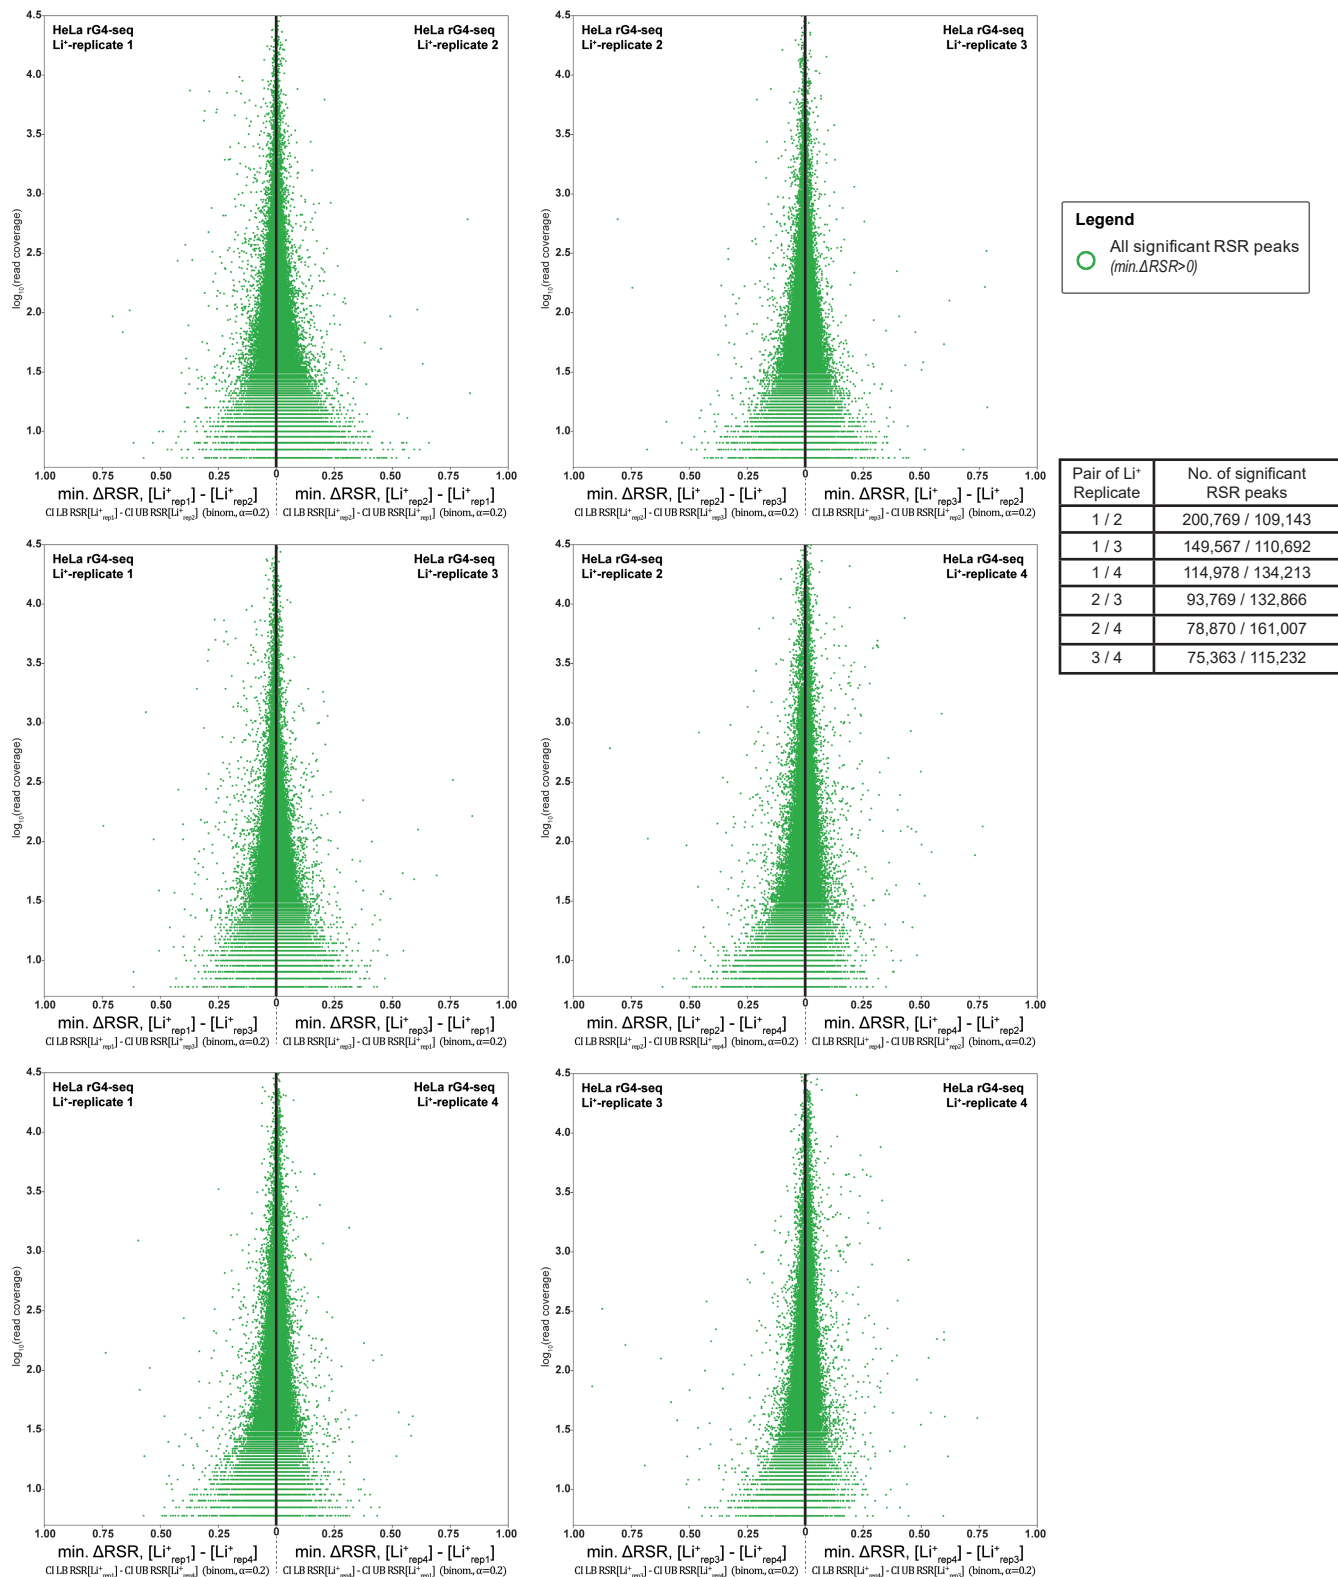

**Figure S4**

Transcriptome-wide significant RSR peaks (minimum  $\Delta RSR > 0$ ) detected from pairwise comparisons between 4 replicates the Li<sup>+</sup> HeLa rG4-seq dataset. Comparison between replicates of identical conditions implies that all detected RSR peaks originated from experimental variations.



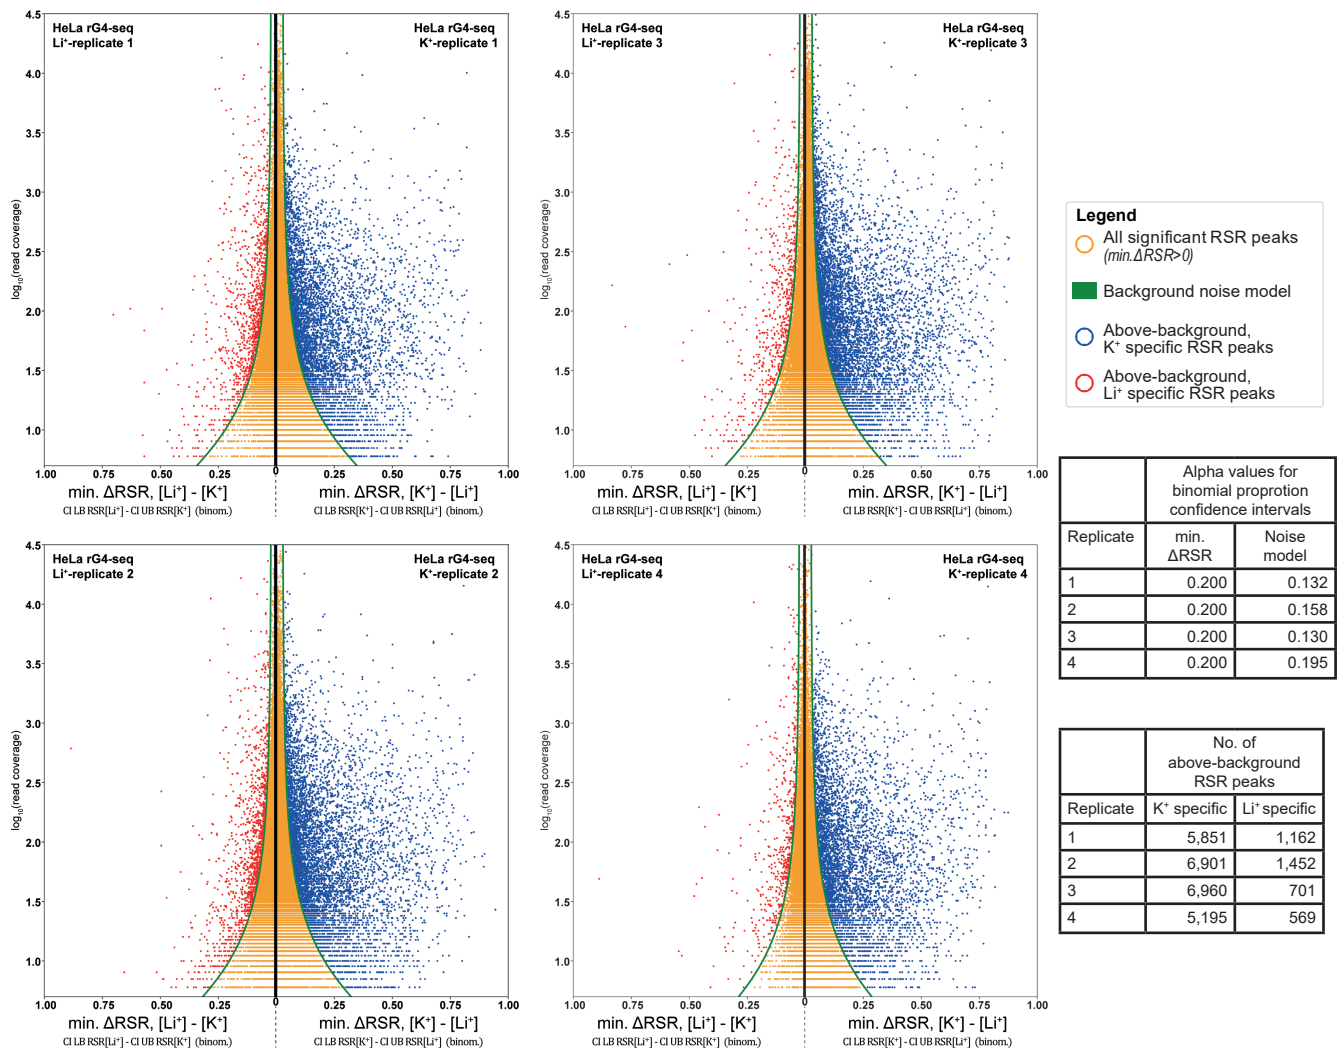

**Figure S5**

RSR peaks identified *ab initio* from pairwise comparison of 4 replicates of HeLa rG4-seq ( $K^+$ ) and HeLa rG4-seq( $Li^+$ ) by applying the minimum  $\Delta RSR$  metric scheme, sequence-based filtering scheme and fragmentation-associated noise model.

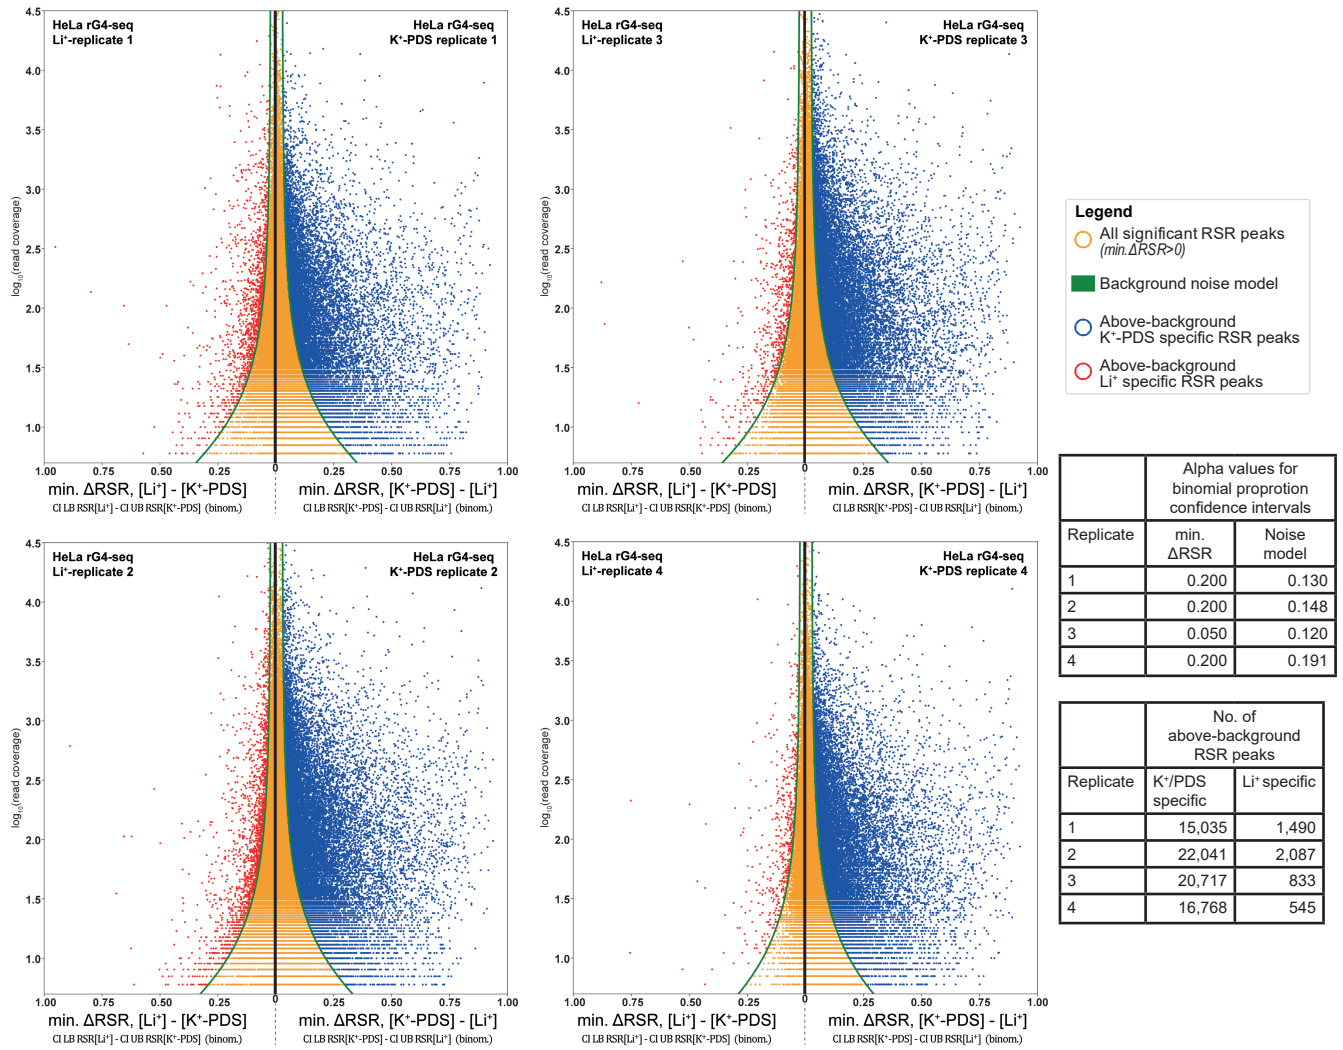

**Figure S6**

RSR peaks identified *ab initio* from pairwise comparison of 4 replicates of HeLa rG4-seq ( $K^+$ -PDS) and HeLa rG4-seq( $Li^+$ ) by applying the minimum  $\Delta RSR$  metric scheme, sequence-based filtering scheme and fragmentation-associated noise model.

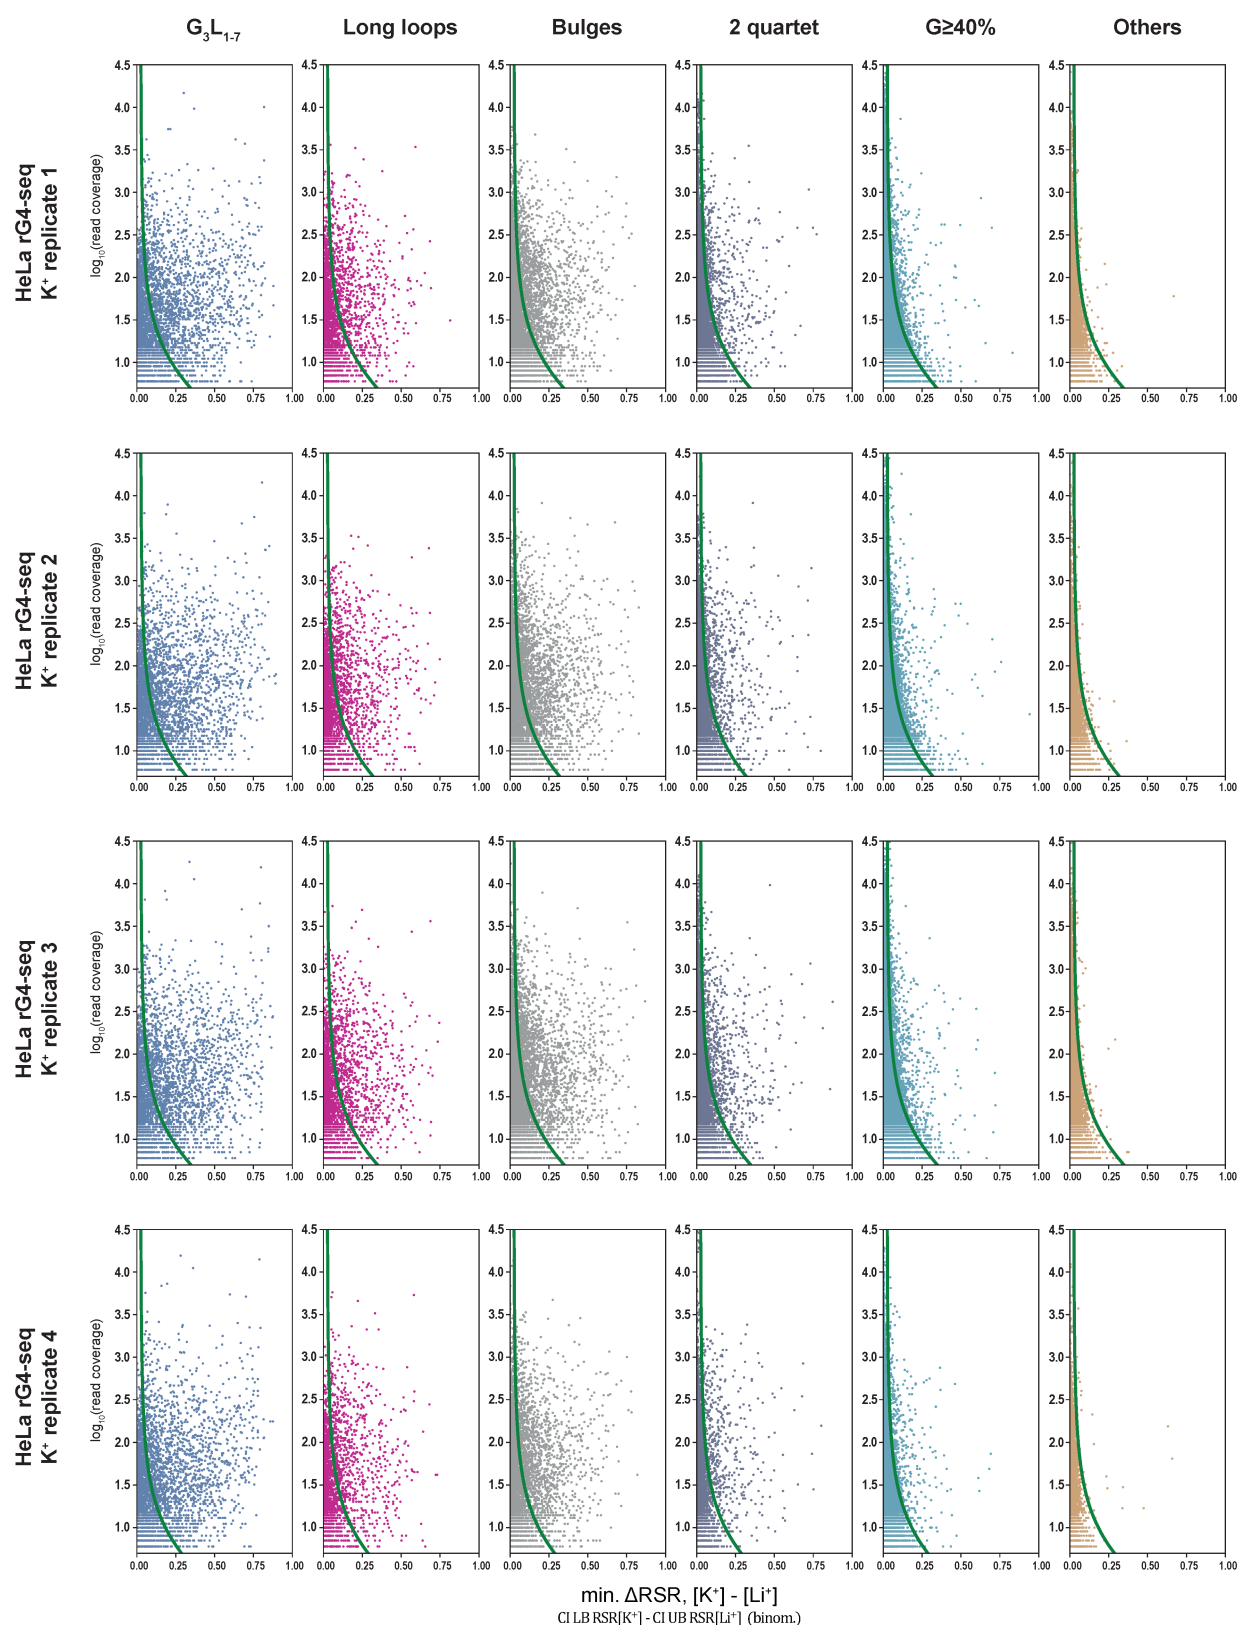

**Figure S7**

Significant ( $\min. \Delta\text{RSR} > 0$ )  $\text{K}^+$  specific RSR peaks identified from the 4 replicates of HeLa rG4-seq ( $\text{K}^+$ ) and HeLa rG4-seq( $\text{Li}^+$ ) (shown in Supplementary Figure S5) further categorized into the 6 structural subclasses ( $\text{G}_3\text{L}_{1-7}$ , long loops, 2-quartet, bulges,  $\text{G} \geq 40\%$  and Others) based on the context of adjacent sequences. Green curves correspond to the background noise model applied to respective replicates.

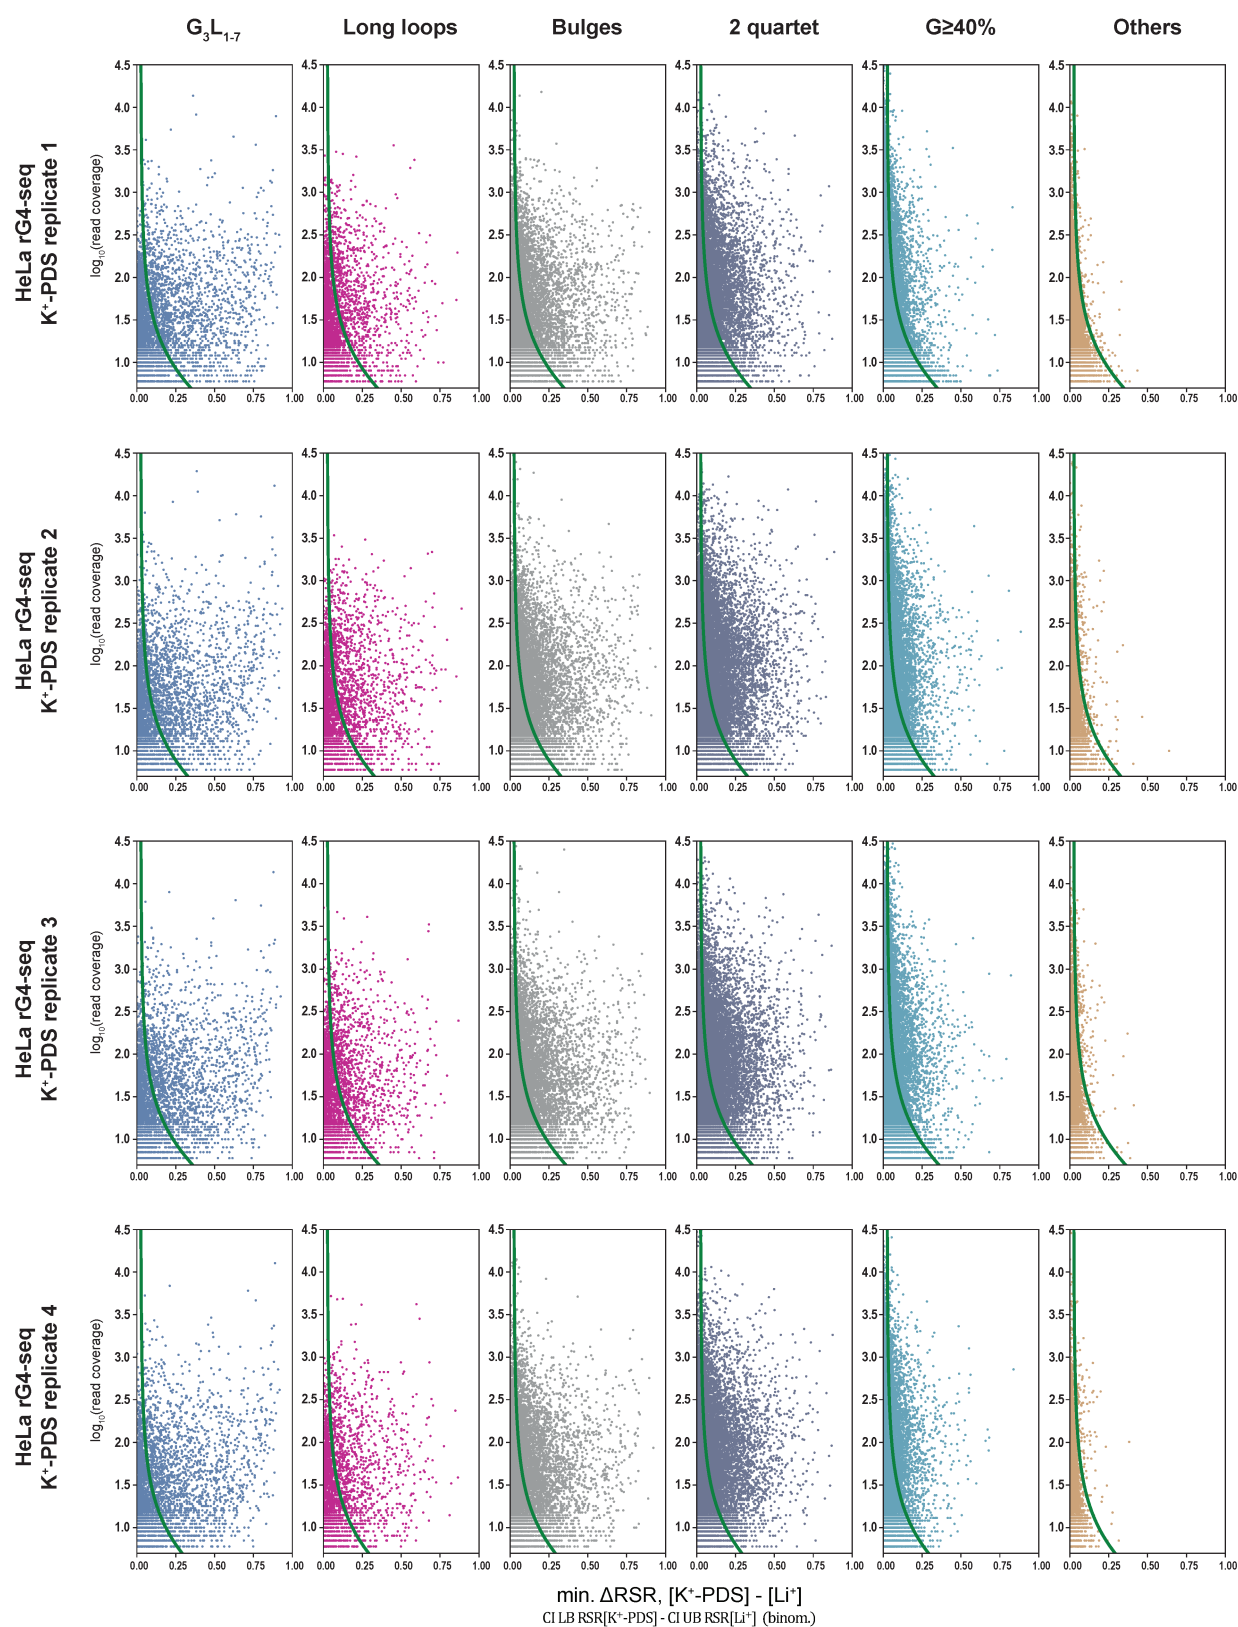

**Figure S8**

Significant ( $\min. \Delta\text{RSR} > 0$ ) K<sup>+</sup>-PDS specific RSR peaks identified from the 4 replicates of HeLa rG4-seq (K<sup>+</sup>-PDS) and HeLa rG4-seq (Li<sup>+</sup>) (shown in Supplementary Figure S6) further categorized into the 6 structural subclasses ( $G_3L_{1-7}$ , long loops, 2-quartet, bulges,  $G \geq 40\%$  and Others) based on the context of adjacent sequences. Green curves correspond to the background noise model applied to respective replicates.

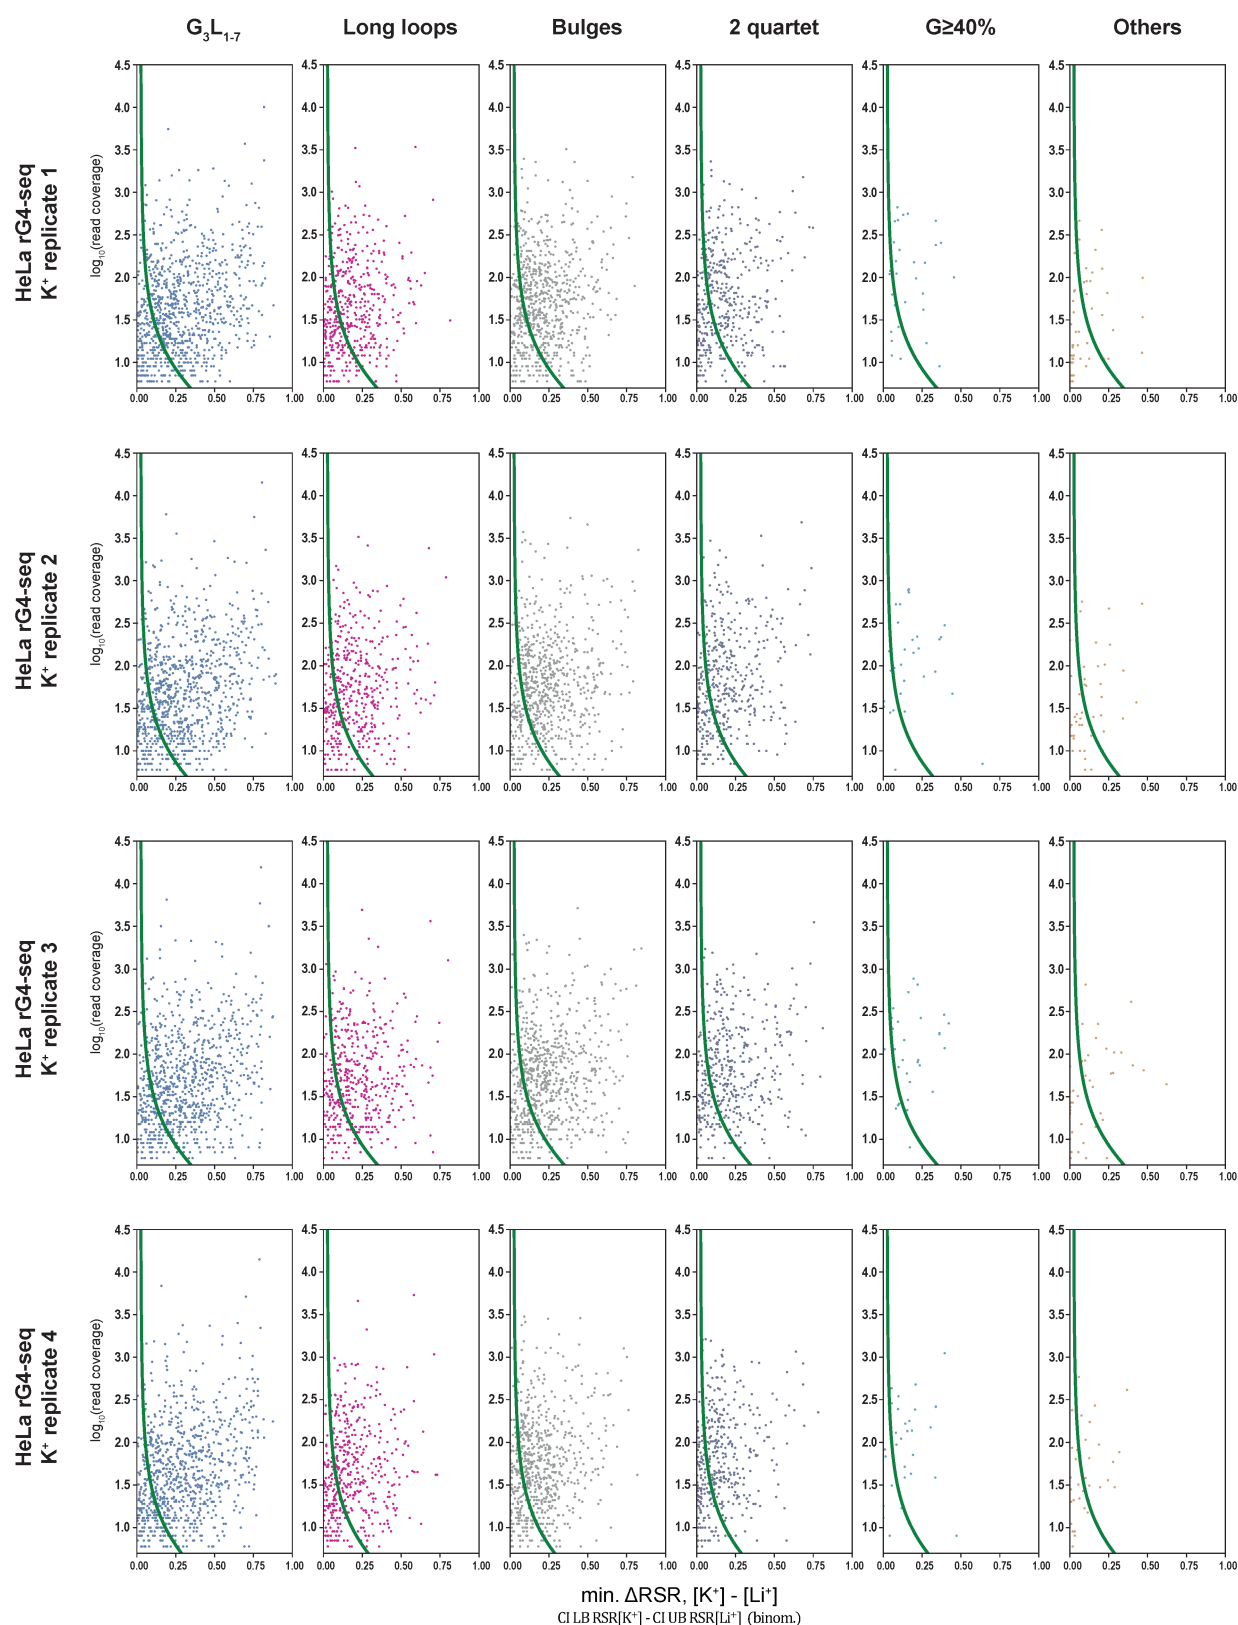

**Figure S9**

Significant ( $\min \Delta\text{RSR} > 0$ )  $\text{K}^+$  specific RSR peaks identified from the 4 replicates of HeLa rG4-seq ( $\text{K}^+$ ) and HeLa rG4-seq( $\text{Li}^+$ ) in this study that matched RTS sites ( $\text{K}^+$ ) previously reported by Kwok et al. (2016). RSR peaks were categorized according to the structural subclass of the matching RTS sites. Green curves correspond to the background noise model applied to respective replicates. Non-significant ( $\min. \Delta\text{RSR} \leq 0$ ) RSR peaks were not shown.



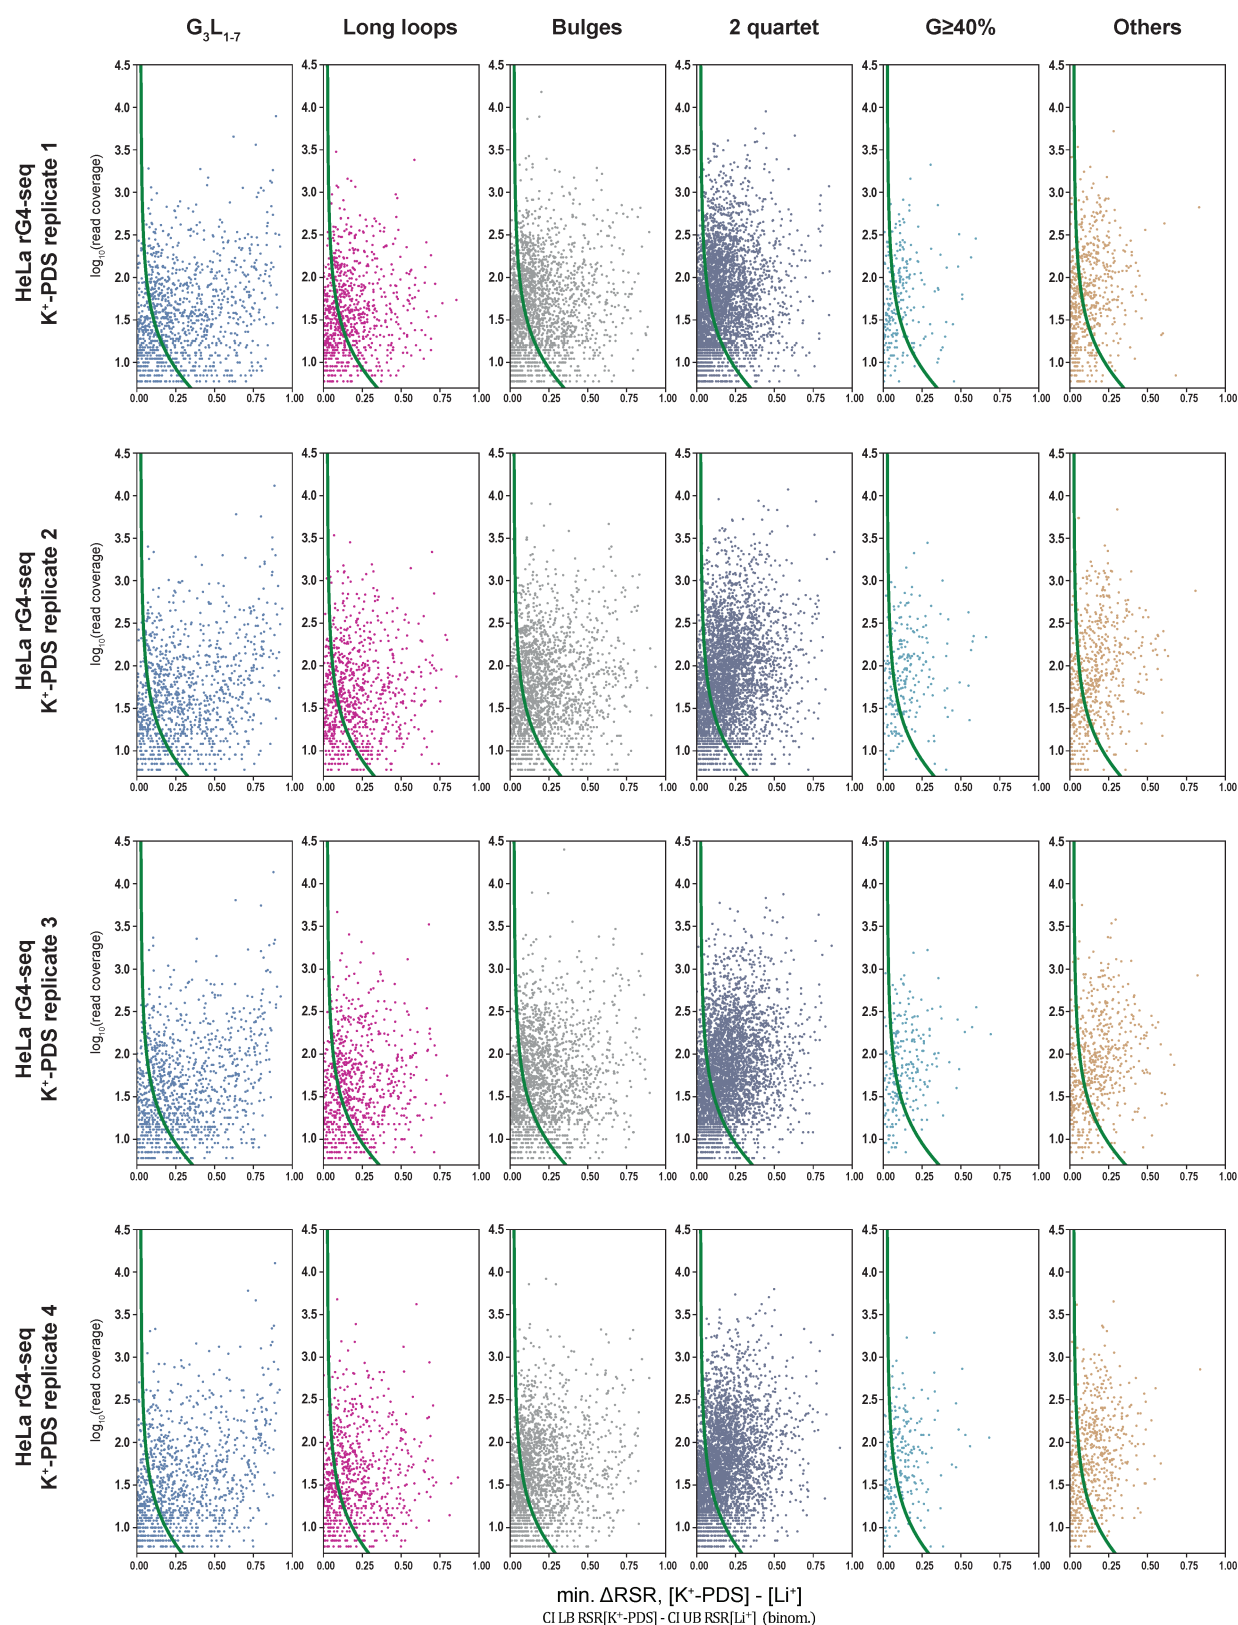

**Figure S10**

Significant ( $\min. \Delta\text{RSR} > 0$ )  $\text{K}^+\text{-PDS}$  specific RSR peaks identified from the 4 replicates of HeLa rG4-seq ( $\text{K}^+\text{-PDS}$ ) and HeLa rG4-seq ( $\text{Li}^+$ ) in this study that matched RTS sites ( $\text{K}^+\text{-PDS}$ ) previously reported by Kwok et al. (2016). RSR peaks were categorized according to the structural subclass of the matching RTS sites. Green curves correspond to the background noise model applied to respective replicates. Non-significant ( $\min. \Delta\text{RSR} \leq 0$ ) RSR peaks were not shown.



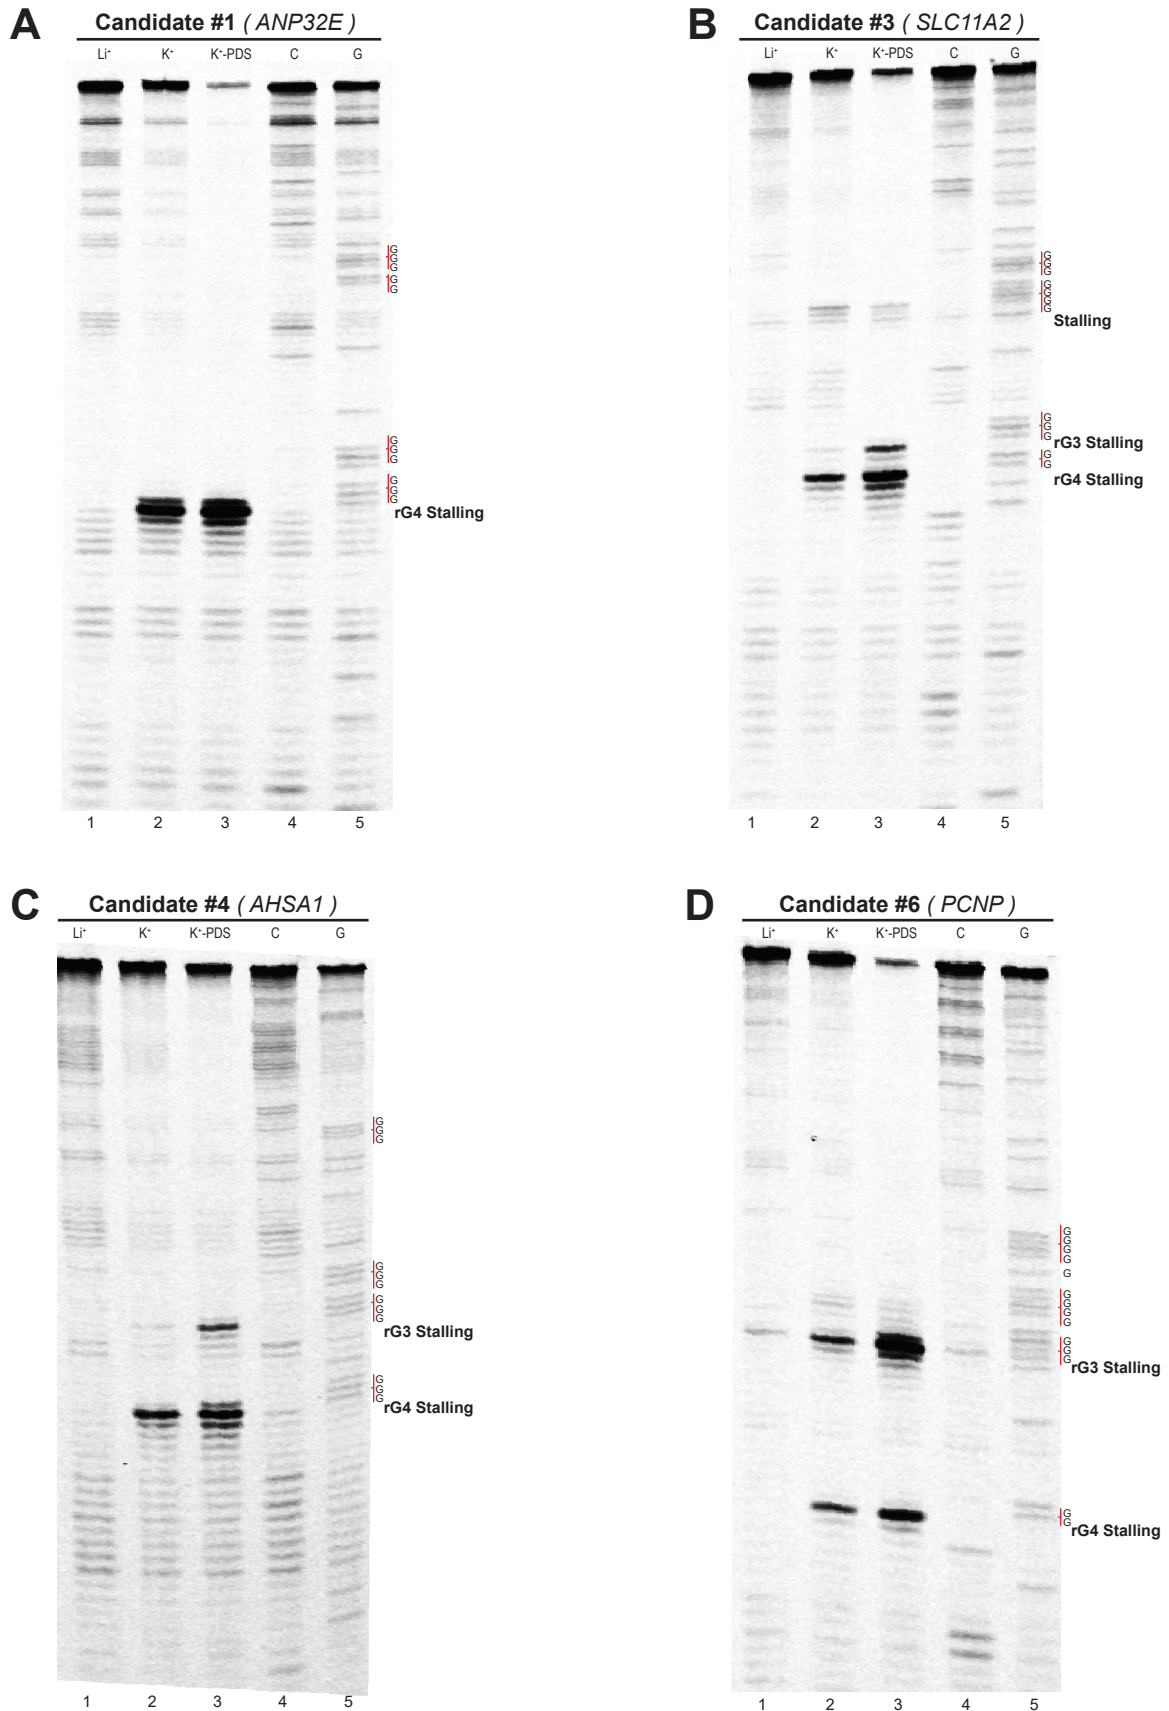

**Figure S11**

(a) RTS PAGE assay of a potential rG4 candidates on *ANP32E* gene indicated clear RTS at the 3' end of the 4<sup>th</sup> G-tract.

(b,c) RTS PAGE assay of two potential rG4 candidates on (b) *SLC11A2* gene (c) *AHSA1* gene indicated clear RTS at the 3' end of the 3<sup>rd</sup> and 4<sup>th</sup> G-tracts, respectively.

(d) A potential rG3 was initially suggested to form on *PCNP* gene based on findings from rG4-seq. RTS PAGE assay revealed a 4<sup>th</sup> G-tract 13 nt downstream of the 3<sup>rd</sup> G-tract, indicating that the region harbored a rG4 motif instead.

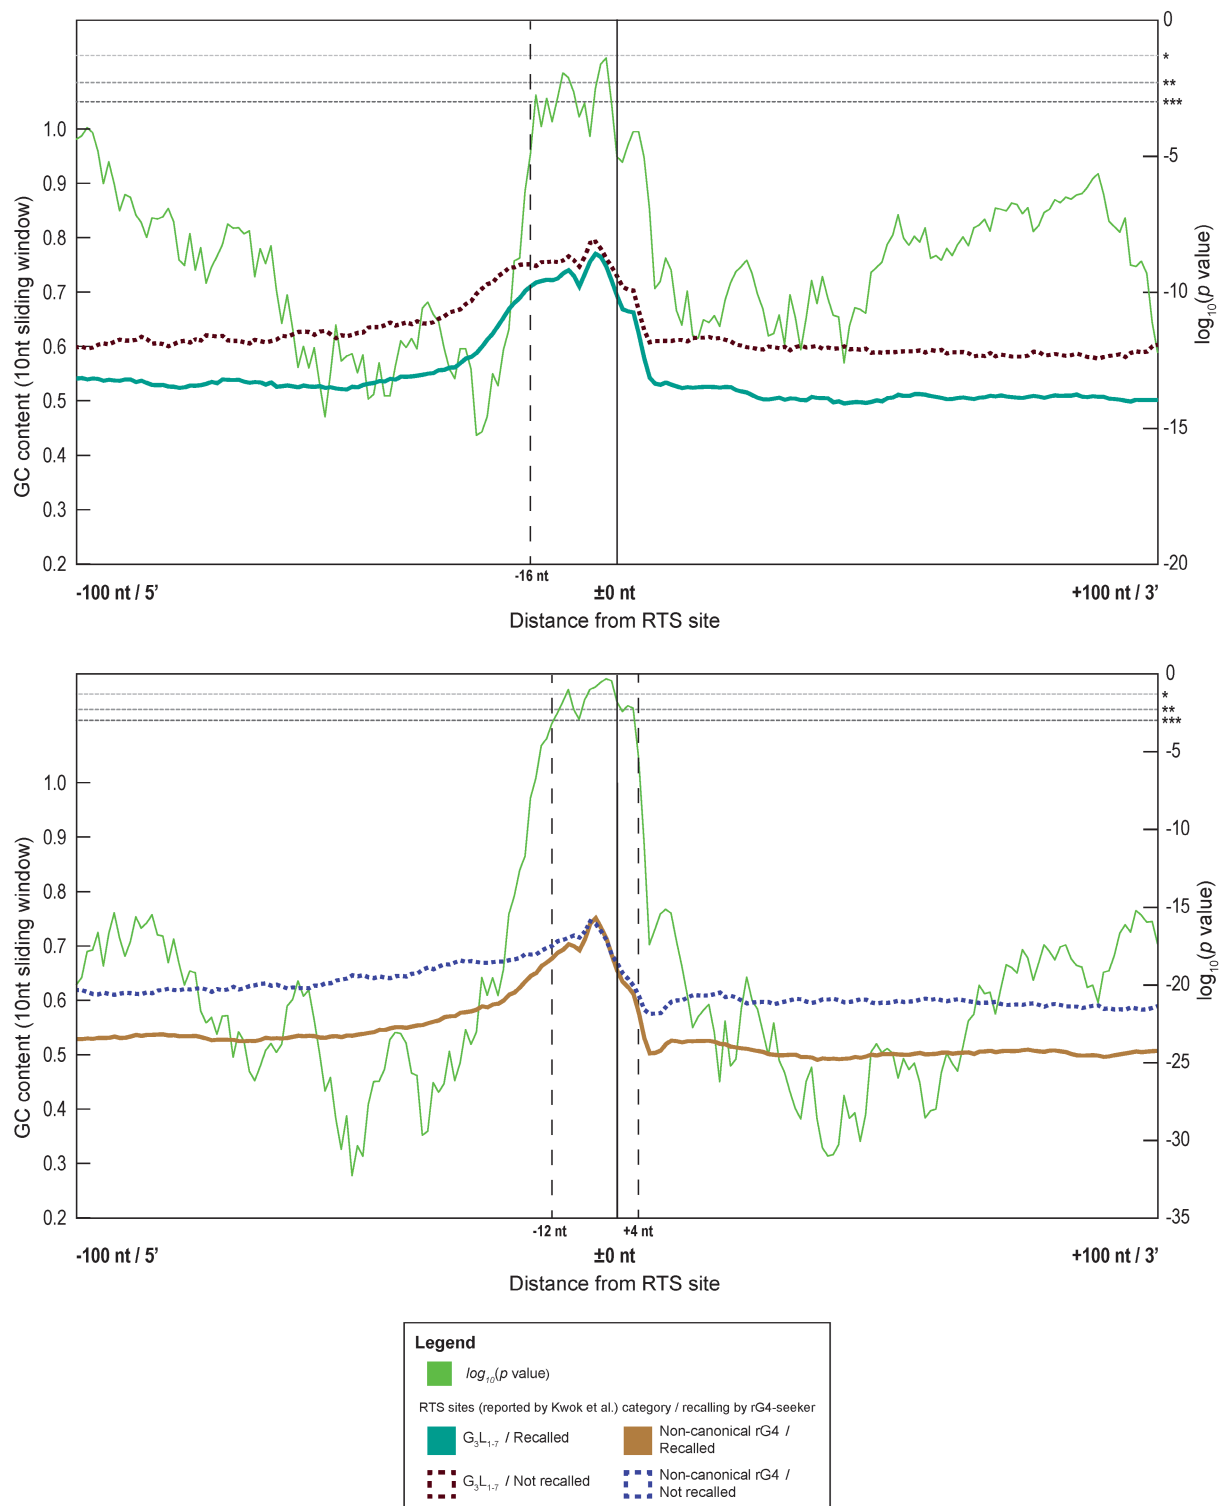

**Figure S12**

Average GC% (10 nt sliding windows) in the  $\pm 100$  nt region of the 3358 RTS sites ( $K^+$ ) reported by Kwok et al. (2016), segregated based on their motif categories (canonical or non-canonical) and recall status by rG4-seeker. Mann-Whitney U test was applied to compare the differences in average GC% values between recalled and non-recalled RTS sites. Corresponding  $\log_{10} p$  values were plotted as separate curves (\*, \*\*, \*\*\* =  $p$ -value < 0.01, 0.005 and 0.001 respectively).

| Chromosome                                 | Start     | End       | Strand | Gene name   | 3' Sequence<br>(30nt)           | RTS site<br>location | RTS site<br>Contains<br>'GGG' Motifs | Detected by<br>Binomial test | Detected by<br>min. ARSR<br>scheme** |
|--------------------------------------------|-----------|-----------|--------|-------------|---------------------------------|----------------------|--------------------------------------|------------------------------|--------------------------------------|
| RTS site adjacent to G residues (35 sites) |           |           |        |             |                                 |                      |                                      |                              |                                      |
| chr1                                       | 21070287  | 21070317  | -      | HP1BP3      | AGTGCTGGGATTACAGGAGTGAGCCACTGT  | chr1:21070287:-      | No                                   | Y                            | Y                                    |
| chr1                                       | 150191011 | 150191041 | -      | ANP32E      | GTATTTTCATGCAAATAAGTAAGGGTGGGT  | chr1:150191011:-     | Yes                                  | Y                            | Y                                    |
| chr1                                       | 180942946 | 180942976 | -      | STX6        | TTACTTAAATGATTTGAGGGGTGGGAGGGA  | chr1:180942946:-     | Yes                                  | Y                            | Y                                    |
| chr1                                       | 185267080 | 185267110 | -      | IVNS1ABP    | GTACACTTGTGAATAAAGAGGGTGGGTGGG  | chr1:185267080:-     | Yes                                  | Y                            | Y                                    |
| chr1                                       | 229773622 | 229773652 | +      | URB2        | TGCAGCAGGTTGTGCTGCAGACAGGAGCTG  | chr1:229773652:+     | No                                   |                              |                                      |
| chr10                                      | 50732243  | 50732273  | -      | ERCC6/PGBD3 | TATGAGCTGAAGCCTCTGCCCAAGGGCGGG  | chr10:50732243:-     | Yes                                  | Y                            |                                      |
| chr11                                      | 17109477  | 17109507  | -      | PIK3C2A     | TTGATAATATATCACTGGGACGGGGTGGGG  | chr11:17109477:-     | Yes                                  | Y                            | Y                                    |
| chr12                                      | 10758800  | 10758830  | -      | MAGOHB      | AGGGGTTATTTGTCATTTACAGTATTGGGG  | chr12:10758800:-     | Yes                                  | Y                            | Y                                    |
| chr12                                      | 16500625  | 16500723  | +      | MGST1       | GGGAGGGGCCAGGGTGGGTGGCAGATGGAAG | chr12:16500723:+     | No                                   |                              |                                      |
| chr12                                      | 16500635  | 16500733  | +      | MGST1       | GGGTGGGTGGCAGATGGAAGACTTGGGGGG  | chr12:16500733:+     | Yes                                  | Y                            |                                      |
| chr14                                      | 81687271  | 81687499  | -      | GTF2A1      | TCTCGGCGGCGGCGGCGGCGGCGGTGGTGG  | chr14:81687271:-     | No                                   | Y                            |                                      |
| chr14                                      | 74164495  | 74164525  | +      | DNAL1       | AGTTTTCTTTTCTCTCTTCTTTTCAATCTG  | chr14:74164525:+     | No                                   |                              |                                      |
| chr15                                      | 86291231  | 86291261  | +      | AKAP13      | TAGATAGACCCTGCCTTAGTAGAGGGTGGG  | chr15:86291261:+     | Yes                                  | Y                            | Y                                    |
| chr16                                      | 19132439  | 19132469  | +      | ITPRIPL2    | GGGATAAAGCATGTATAAGTTGGGAGAGGG  | chr16:19132469:+     | Yes                                  | Y                            | Y                                    |
| chr16                                      | 85707376  | 85707406  | +      | KIAA0182    | GTGACAGTCATGTGCACACATGGGCGGGGG  | chr16:85707406:+     | Yes                                  | Y                            | Y                                    |
| chr17                                      | 3715611   | 3715641   | -      | C17orf85    | TTTGGGGTTGATTTTTGTGCTGGGGTGGGA  | chr17:3715611:-      | Yes                                  | Y                            | Y                                    |
| chr17                                      | 49257909  | 49257939  | -      | MBTD1       | GAGGTGGCTTAGAACTGAGGGCGGGTGGG   | chr17:49257909:-     | Yes                                  | Y                            | Y                                    |
| chr17                                      | 60023147  | 60023177  | -      | MED13       | CGATGTACAGTTTAACGGGGATAGAGGGGG  | chr17:60023147:-     | Yes                                  | Y                            | Y                                    |
| chr17                                      | 7210424   | 7210876   | +      | EIF5A       | CGCTTGCGCAGTGCGGGGGTGGAGGGCGGA  | chr17:7210876:+      | Yes                                  | Y                            | Y                                    |
| chr17                                      | 40128540  | 40128570  | +      | CNP         | GTCCACCCCCGCCTCCCTCCCCTGCCCTCG  | chr17:40128570:+     | No                                   |                              |                                      |
| chr19                                      | 59028606  | 59028636  | -      | ZBTB45      | CTGCCCACCCCTGTGCCCCCGCCACTCGCA  | chr19:59028606:-     | No                                   |                              |                                      |
| chr2                                       | 68406110  | 68406140  | -      | PPP3R1      | TTTTTTTTTTTTAGTTTGTGTGTGGGGGTG  | chr2:68406110:-      | Yes                                  |                              |                                      |

|                                                      |           |           |   |              |                                |                  |     |   |   |
|------------------------------------------------------|-----------|-----------|---|--------------|--------------------------------|------------------|-----|---|---|
| chr2                                                 | 201676698 | 201676923 | + | BZW1         | GGGTAGCGGCGGCCCGGGTGGGGAGGTGGG | chr2:201676923:+ | Yes | Y | Y |
| chr22                                                | 21356311  | 21356341  | + | THAP7-AS1    | CGGCCCGTTGTCGCCCCAACCCCGTCCCAG | chr22:21356341:+ | No  |   |   |
| chr3                                                 | 152017907 | 152017937 | + | MBNL1        | TGGTTGTTGCTCTTTTTTGGGGGGGTTGGG | chr3:152017937:+ | Yes | Y | Y |
| chr5                                                 | 126172247 | 126172277 | + | LMNB1        | TTTTTTAAGTTCTTATGAGGAGGGGAGGGT | chr5:126172277:+ | Yes | Y | Y |
| chr6                                                 | 43586704  | 43586734  | + | POLH         | GGGGTTCTATATTTAGTTTGAAGAGGTGGG | chr6:43586734:+  | Yes | Y |   |
| chr6                                                 | 145172425 | 145172455 | + | UTRN         | ATGTATACAGCATTGGGAAAGTGGGTGGGG | chr6:145172455:+ | Yes | Y | Y |
| chr7                                                 | 97851053  | 97851716  | - | TECPR1       | CAGCCTCCCCTTCGCAGGTGACTGCTGGTA | chr7:97851053:-  | No  |   |   |
| chr7                                                 | 94298466  | 94298496  | + | PEG10        | ATAATCATAAGCATTTTAGGGTGGGAGGGA | chr7:94298496:+  | Yes | Y | Y |
| chr9                                                 | 14086231  | 14086261  | - | NFIB         | CATATATATATATTCTGGGGTGGGTGGGAG | chr9:14086231:-  | Yes | Y | Y |
| chr9                                                 | 2193003   | 2193033   | + | SMARCA2      | TGGGTGGATAGTATATTTCTATGGGTGGGT | chr9:2193033:+   | Yes | Y | Y |
| chrX                                                 | 150158023 | 150158053 | + | HMGB3        | GTAACATTTTATCCAGGTTGGGGTGAGGGG | chrX:150158053:+ | Yes | Y | Y |
| <b>RTS site non-adjacent to G residues (7 sites)</b> |           |           |   |              |                                |                  |     |   |   |
| chr1                                                 | 202554249 | 202554279 | + | PPP1R12B     | AGCAGCTAGGACTGCAGGTGTGCACCACCA | chr1:202554279:+ | No  |   |   |
| chr15                                                | 56735938  | 56735968  | - | MNS1         | AAGAAACGTGAGGAGATGGAAGAAGAAAAC | chr15:56735938:- | No  |   |   |
| chr16                                                | 58554140  | 58554170  | - | CNOT1        | CCTAAAGCCCACCCCTACCCTACCCCCCCC | chr16:58554140:- | No  | Y |   |
| chr19                                                | 11033127  | 11033157  | + | CARM1        | CCCCTGCAGGTCCCCCCCCGCCCCCCCCT  | chr19:11033157:+ | No  |   |   |
| chr19                                                | 56152393  | 56152413  | + | ZNF580       | CCTCGCACCCCCGCGCCCCC           | chr19:56152413:+ | No  |   |   |
| chr3                                                 | 53319128  | 53319158  | - | DCP1A        | TTTGTGTGCCACCCCCACCCCCAGGGTCT  | chr3:53319128:-  | Yes |   |   |
| chr3                                                 | 15296907  | 15296937  | + | LOC100505696 | GTCCCTCCTACCCTCATCCCCCGCATCCC  | chr3:15296937:+  | No  |   |   |
| chr9                                                 | 112810945 | 112810975 | + | AKAP2        | CTCCAGCGCGCCCGGAGGCTACCACTCCCT | chr9:112810975:+ | No  |   |   |

**Table S1**

Details of 42 “Others” RTS sites previously reported in Kwok et al. (2016) and simultaneously recalled with RSR metric and binomial test / minimum  $\Delta$ RSR scheme from both rG4-seq ( $K^+$ ) and rG4-seq ( $K^+$ -PDS). Genomic coordinates were corresponding to GRCh37/hg19 human reference genome. Properties of the RTS sites (adjacency to G residues / containing ‘GGG’ motifs) and their recalling status were shown in the table.

| RTS sites (K <sup>+</sup> )<br>reported by<br>Kwok et al. (2016) | G <sub>3</sub> L <sub>1-7</sub>                |                                                |                               | Long loops                                     |                                                |                               | Bulges                                         |                                                |                               | 2 quartet                                      |                                                |                               | G≥40%                                          |                                                |                               | Others                                         |                                                |                               |
|------------------------------------------------------------------|------------------------------------------------|------------------------------------------------|-------------------------------|------------------------------------------------|------------------------------------------------|-------------------------------|------------------------------------------------|------------------------------------------------|-------------------------------|------------------------------------------------|------------------------------------------------|-------------------------------|------------------------------------------------|------------------------------------------------|-------------------------------|------------------------------------------------|------------------------------------------------|-------------------------------|
| Status of<br>matching<br>RSR peak                                | Significant (min. ΔRSR>0),<br>Above-background | Significant (min. ΔRSR>0),<br>Below-background | Not significant (min. ΔRSR≤0) | Significant (min. ΔRSR>0),<br>Above-background | Significant (min. ΔRSR>0),<br>Below-background | Not significant (min. ΔRSR≤0) | Significant (min. ΔRSR>0),<br>Above-background | Significant (min. ΔRSR>0),<br>Below-background | Not significant (min. ΔRSR≤0) | Significant (min. ΔRSR>0),<br>Above-background | Significant (min. ΔRSR>0),<br>Below-background | Not significant (min. ΔRSR≤0) | Significant (min. ΔRSR>0),<br>Above-background | Significant (min. ΔRSR>0),<br>Below-background | Not significant (min. ΔRSR≤0) | Significant (min. ΔRSR>0),<br>Above-background | Significant (min. ΔRSR>0),<br>Below-background | Not significant (min. ΔRSR≤0) |
| K <sup>+</sup><br>replicate 1                                    | 704 (61.6%)                                    | 210 (18.4%)                                    | 229 (20.0%)                   | 312 (52.6%)                                    | 166 (28.0%)                                    | 115 (19.4%)                   | 554 (59.8%)                                    | 194 (21.0%)                                    | 178 (19.2%)                   | 295 (46.5%)                                    | 132 (20.8%)                                    | 208 (32.8%)                   | 22 (36.1%)                                     | 10 (16.4%)                                     | 29 (47.5%)                    | 21 (4.6%)                                      | 38 (8.3%)                                      | 401 (87.2%)                   |
| K <sup>+</sup><br>replicate 2                                    | 717 (62.7%)                                    | 178 (15.6%)                                    | 248 (21.7%)                   | 335 (56.5%)                                    | 116 (19.6%)                                    | 142 (23.9%)                   | 583 (63.0%)                                    | 131 (14.1%)                                    | 212 (22.9%)                   | 297 (46.8%)                                    | 112 (17.6%)                                    | 226 (35.6%)                   | 24 (39.3%)                                     | 8 (13.1%)                                      | 29 (47.5%)                    | 21 (4.6%)                                      | 24 (5.2%)                                      | 415 (90.2%)                   |
| K <sup>+</sup><br>replicate 3                                    | 712 (62.3%)                                    | 181 (15.8%)                                    | 250 (21.9%)                   | 348 (58.7%)                                    | 119 (20.1%)                                    | 126 (21.2%)                   | 576 (62.2%)                                    | 171 (18.5%)                                    | 179 (19.3%)                   | 322 (50.7%)                                    | 99 (15.6%)                                     | 214 (33.7%)                   | 26 (42.6%)                                     | 5 (8.2%)                                       | 30 (49.2%)                    | 22 (4.8%)                                      | 21 (4.6%)                                      | 417 (90.7%)                   |
| K <sup>+</sup><br>replicate 4                                    | 695 (60.8%)                                    | 170 (14.9%)                                    | 278 (24.3%)                   | 327 (55.1%)                                    | 128 (21.6%)                                    | 138 (23.3%)                   | 534 (57.7%)                                    | 175 (18.9%)                                    | 217 (23.4%)                   | 282 (44.4%)                                    | 128 (20.2%)                                    | 225 (35.4%)                   | 24 (39.3%)                                     | 7 (11.5%)                                      | 30 (49.2%)                    | 17 (3.7%)                                      | 18 (3.9%)                                      | 425 (92.4%)                   |

**Table S2**  
 Status of RSR peaks that matched with RTS sites (K<sup>+</sup>) reported by Kwok et al. (2016).

| RTS sites (K <sup>+</sup> -PDS)<br>reported by<br>Kwok et al. (2016) | G <sub>3</sub> L <sub>1-7</sub>                |                                                |                               | Long loops                                     |                                                |                               | Bulges                                         |                                                |                               | 2 quartet                                      |                                                |                               | G≥40%                                          |                                                |                               | Others                                         |                                                |                               |
|----------------------------------------------------------------------|------------------------------------------------|------------------------------------------------|-------------------------------|------------------------------------------------|------------------------------------------------|-------------------------------|------------------------------------------------|------------------------------------------------|-------------------------------|------------------------------------------------|------------------------------------------------|-------------------------------|------------------------------------------------|------------------------------------------------|-------------------------------|------------------------------------------------|------------------------------------------------|-------------------------------|
| Status of<br>matching<br>RSR peak                                    | Significant (min. ΔRSR>0),<br>Above-background | Significant (min. ΔRSR>0),<br>Below-background | Not significant (min. ΔRSR≤0) | Significant (min. ΔRSR>0),<br>Above-background | Significant (min. ΔRSR>0),<br>Below-background | Not significant (min. ΔRSR≤0) | Significant (min. ΔRSR>0),<br>Above-background | Significant (min. ΔRSR>0),<br>Below-background | Not significant (min. ΔRSR≤0) | Significant (min. ΔRSR>0),<br>Above-background | Significant (min. ΔRSR>0),<br>Below-background | Not significant (min. ΔRSR≤0) | Significant (min. ΔRSR>0),<br>Above-background | Significant (min. ΔRSR>0),<br>Below-background | Not significant (min. ΔRSR≤0) | Significant (min. ΔRSR>0),<br>Above-background | Significant (min. ΔRSR>0),<br>Below-background | Not significant (min. ΔRSR≤0) |
| K <sup>+</sup> -PDS<br>replicate 1                                   | 824 (51.0%)                                    | 339 (21.0%)                                    | 453 (28.0%)                   | 524 (42.8%)                                    | 332 (27.1%)                                    | 368 (30.1%)                   | 1,308 (46.3%)                                  | 780 (27.6%)                                    | 735 (26.0%)                   | 2,444 (47.1%)                                  | 1,368 (26.4%)                                  | 1,379 (26.6%)                 | 143 (32.7%)                                    | 120 (27.5%)                                    | 174 (39.8%)                   | 342 (16.7%)                                    | 323 (15.8%)                                    | 1,382 (67.5%)                 |
| K <sup>+</sup> -PDS<br>replicate 2                                   | 841 (52.0%)                                    | 267 (16.5%)                                    | 508 (31.4%)                   | 601 (49.1%)                                    | 247 (20.2%)                                    | 376 (30.7%)                   | 1,469 (52.0%)                                  | 548 (19.4%)                                    | 806 (28.6%)                   | 2,879 (55.5%)                                  | 929 (17.9%)                                    | 1,383 (26.6%)                 | 167 (38.2%)                                    | 82 (18.8%)                                     | 188 (43.0%)                   | 432 (21.1%)                                    | 207 (10.1%)                                    | 1,408 (68.8%)                 |
| K <sup>+</sup> -PDS<br>replicate 3                                   | 824 (51.0%)                                    | 310 (19.2%)                                    | 482 (29.8%)                   | 561 (45.8%)                                    | 264 (21.6%)                                    | 399 (32.6%)                   | 1,417 (50.2%)                                  | 606 (21.5%)                                    | 800 (28.3%)                   | 2,790 (53.7%)                                  | 1,063 (20.5%)                                  | 1,338 (25.8%)                 | 157 (35.9%)                                    | 101 (23.1%)                                    | 179 (41.0%)                   | 415 (20.3%)                                    | 212 (10.4%)                                    | 1,420 (69.4%)                 |
| K <sup>+</sup> -PDS<br>replicate 4                                   | 808 (50.0%)                                    | 274 (17.0%)                                    | 534 (33.0%)                   | 549 (44.9%)                                    | 246 (20.1%)                                    | 429 (35.0%)                   | 1,356 (48.0%)                                  | 611 (21.6%)                                    | 856 (30.3%)                   | 2,661 (51.3%)                                  | 1,048 (20.2%)                                  | 1,482 (28.5%)                 | 156 (35.7%)                                    | 84 (19.2%)                                     | 197 (45.1%)                   | 400 (19.5%)                                    | 209 (10.2%)                                    | 1,438 (70.2%)                 |

**Table S3**  
 Status of RSR peaks that matched with RTS sites (K<sup>+</sup>-PDS) reported by Kwok et al. (2016).



| TablMin.<br>Read<br>coverage | rg4-seq<br>condition | #Replicate | $\sum$ (sequenced<br>positions) | $\sum$ (sequenced<br>positions<br>containing<br>$\geq 1$ read start) | $P(B)$ | $\sum$ (read coverage of<br>sequenced positions<br>containing<br>$\geq 1$ read start) | $\sum$ (read starts in<br>sequenced<br>positions) | $P(A \cap B)$ | $P(A B)$ |
|------------------------------|----------------------|------------|---------------------------------|----------------------------------------------------------------------|--------|---------------------------------------------------------------------------------------|---------------------------------------------------|---------------|----------|
| $\geq 6x$                    | K <sup>+</sup>       | 1          | 43,446,617                      | 15,559,362                                                           | 0.3581 | 3,565,444,556                                                                         | 63,742,568                                        | 0.0179        | 0.0500   |
| $\geq 6x$                    | K <sup>+</sup>       | 2          | 41,216,131                      | 13,017,953                                                           | 0.3158 | 3,475,638,448                                                                         | 55,074,928                                        | 0.0158        | 0.0500   |
| $\geq 6x$                    | K <sup>+</sup>       | 3          | 42,105,455                      | 13,507,453                                                           | 0.3208 | 2,938,246,465                                                                         | 53,703,833                                        | 0.0183        | 0.0570   |
| $\geq 6x$                    | K <sup>+</sup>       | 4          | 52,722,179                      | 18,186,769                                                           | 0.3450 | 4,335,282,487                                                                         | 71,534,010                                        | 0.0165        | 0.0478   |
| $\geq 6x$                    | K <sup>+</sup> -PDS  | 1          | 42,869,611                      | 14,025,229                                                           | 0.3272 | 3,289,338,871                                                                         | 57,789,844                                        | 0.0176        | 0.0538   |
| $\geq 6x$                    | K <sup>+</sup> -PDS  | 2          | 43,987,073                      | 13,504,356                                                           | 0.3070 | 4,094,271,905                                                                         | 60,450,721                                        | 0.0148        | 0.0482   |
| $\geq 6x$                    | K <sup>+</sup> -PDS  | 3          | 45,369,082                      | 14,425,694                                                           | 0.3180 | 3,571,228,263                                                                         | 58,973,001                                        | 0.0165        | 0.0519   |
| $\geq 6x$                    | K <sup>+</sup> -PDS  | 4          | 48,887,275                      | 16,817,154                                                           | 0.3440 | 3,588,040,463                                                                         | 62,777,600                                        | 0.0175        | 0.0509   |
| $\geq 6x$                    | Li <sup>+</sup>      | 1          | 51,853,328                      | 18,478,171                                                           | 0.3564 | 5,911,086,239                                                                         | 94,523,439                                        | 0.0160        | 0.0449   |
| $\geq 6x$                    | Li <sup>+</sup>      | 2          | 44,667,183                      | 14,294,298                                                           | 0.3200 | 4,498,217,619                                                                         | 68,307,246                                        | 0.0152        | 0.0475   |
| $\geq 6x$                    | Li <sup>+</sup>      | 3          | 46,364,524                      | 14,839,833                                                           | 0.3201 | 3,945,219,400                                                                         | 60,734,921                                        | 0.0154        | 0.0481   |
| $\geq 6x$                    | Li <sup>+</sup>      | 4          | 61,746,013                      | 22,473,562                                                           | 0.3640 | 6,364,155,240                                                                         | 102,464,720                                       | 0.0161        | 0.0442   |
|                              |                      |            |                                 |                                                                      |        |                                                                                       |                                                   |               |          |
| $\geq 2048x$                 | K <sup>+</sup>       | 1          | 205,377                         | 195,888                                                              | 0.9538 | 1,025,436,370                                                                         | 14,098,748                                        | 0.0137        | 0.0144   |
| $\geq 2048x$                 | K <sup>+</sup>       | 2          | 221,608                         | 210,082                                                              | 0.9480 | 1,135,915,016                                                                         | 13,551,271                                        | 0.0119        | 0.0126   |
| $\geq 2048x$                 | K <sup>+</sup>       | 3          | 171,093                         | 161,626                                                              | 0.9447 | 868,319,850                                                                           | 11,693,007                                        | 0.0135        | 0.0143   |
| $\geq 2048x$                 | K <sup>+</sup>       | 4          | 246,912                         | 235,807                                                              | 0.9550 | 1,263,548,976                                                                         | 16,413,174                                        | 0.0130        | 0.0136   |
| $\geq 2048x$                 | K <sup>+</sup> -PDS  | 1          | 188,137                         | 179,164                                                              | 0.9523 | 960,864,841                                                                           | 12,600,469                                        | 0.0131        | 0.0138   |
| $\geq 2048x$                 | K <sup>+</sup> -PDS  | 2          | 263,891                         | 250,757                                                              | 0.9502 | 1,393,577,813                                                                         | 15,607,667                                        | 0.0112        | 0.0118   |
| $\geq 2048x$                 | K <sup>+</sup> -PDS  | 3          | 210,136                         | 200,039                                                              | 0.9520 | 1,103,055,047                                                                         | 13,721,284                                        | 0.0124        | 0.0130   |
| $\geq 2048x$                 | K <sup>+</sup> -PDS  | 4          | 197,311                         | 187,999                                                              | 0.9528 | 978,523,049                                                                           | 13,190,069                                        | 0.0135        | 0.0142   |
| $\geq 2048x$                 | Li <sup>+</sup>      | 1          | 376,146                         | 362,479                                                              | 0.9637 | 2,057,673,637                                                                         | 26,572,792                                        | 0.0129        | 0.0134   |
| $\geq 2048x$                 | Li <sup>+</sup>      | 2          | 299,899                         | 286,568                                                              | 0.9555 | 1,615,155,435                                                                         | 19,049,791                                        | 0.0118        | 0.0123   |
| $\geq 2048x$                 | Li <sup>+</sup>      | 3          | 240,977                         | 229,948                                                              | 0.9542 | 1,308,568,932                                                                         | 15,330,434                                        | 0.0117        | 0.0123   |
| $\geq 2048x$                 | Li <sup>+</sup>      | 4          | 396,186                         | 382,689                                                              | 0.9659 | 2,082,612,795                                                                         | 27,703,361                                        | 0.0133        | 0.0138   |

**Table S4**

Raw number figures for deriving the conditional probability  $P(A|B)$  for statistical modelling of fragmentation-associated background noise, where:

A: receiving 1 read start per 1x read coverage

B: receiving at least 1 read start

| rG4-seq condition   | #Replicate | Average aligned read length | 1                                  |
|---------------------|------------|-----------------------------|------------------------------------|
|                     |            |                             | <i>Average aligned read length</i> |
| K <sup>+</sup>      | 1          | 71                          | 0.014085                           |
| K <sup>+</sup>      | 2          | 82                          | 0.012195                           |
| K <sup>+</sup>      | 3          | 72                          | 0.013889                           |
| K <sup>+</sup>      | 4          | 76                          | 0.013158                           |
| K <sup>+</sup> -PDS | 1          | 74                          | 0.013514                           |
| K <sup>+</sup> -PDS | 2          | 87                          | 0.011494                           |
| K <sup>+</sup> -PDS | 3          | 79                          | 0.012658                           |
| K <sup>+</sup> -PDS | 4          | 73                          | 0.013699                           |
| Li <sup>+</sup>     | 1          | 75                          | 0.013333                           |
| Li <sup>+</sup>     | 2          | 82                          | 0.012195                           |
| Li <sup>+</sup>     | 3          | 83                          | 0.012048                           |
| Li <sup>+</sup>     | 4          | 74                          | 0.013514                           |

**Table S5**

Statistics of averaged aligned read lengths in HeLa rG4-seq datasets
